# Supplementary material for: Lecciones de historia de las matemáticas
Source: Frontiers journal article supplement (doi:10.3389/fsoc.2021.610432), 1998-01-01
Supplement: Table_1.DOC [file Table_1.DOC]

Figure 1. Immigration to the United States: 1820-2019. Annual totals represent the number of persons admitted to legal permanent residence (DHS 2019, Table 1).

Figure 2. Immigration to the United States: Four Immigration Eras,

1820-2019. Vertical lines at 1875, 1921, and 1965, marking the

start of the Second through Fourth Immigration Eras.
